# Supplementary material for: A checklist is associated with increased quality of reporting preclinical biomedical research: A systematic review
Source: PubMed Central journal article supplement (PMC5597130; doi:10.1371/journal.pone.0183591), 2017-09-13
Supplement: pone.0183591.s002.pdf [file pone.0183591.s002.pdf]

**S2 Table. Quality of reporting across time in each journal: percent (%)**

|                                            |                             | <i>Cell</i> |      |                              | <i>Nature</i> |      |                              |
|--------------------------------------------|-----------------------------|-------------|------|------------------------------|---------------|------|------------------------------|
|                                            |                             | 2013        | 2015 | <i>p</i> -value <sup>a</sup> | 2013          | 2015 | <i>p</i> -value <sup>b</sup> |
| <b>Description of animals</b>              |                             |             |      |                              |               |      |                              |
| <b>Source</b>                              | Not reported                | 15          | 15   | 0.9011                       | 20            | 20   | > 0.9999                     |
|                                            | Some reported               | 20          | 30   |                              | 35            | 35   |                              |
|                                            | All reported                | 65          | 55   |                              | 45            | 45   |                              |
| <b>Species</b>                             | All reported                | 100         | 100  | N/A                          | 100           | 100  | N/A                          |
| <b>Strain</b>                              | Some reported               | 0           | 0    | N/A                          | 10            | 5    | > 0.9999                     |
|                                            | All reported                | 100         | 100  |                              | 90            | 95   |                              |
| <b>Sex</b>                                 | Not reported                | 55          | 30   | 0.1626                       | 50            | 15   | 0.0625                       |
|                                            | Some reported               | 15          | 10   |                              | 10            | 20   |                              |
|                                            | All reported                | 30          | 60   |                              | 40            | 65   |                              |
| <b>Age</b>                                 | Not reported                | 5           | 15   | 0.4128                       | 5             | 5    | 0.1818                       |
|                                            | Some reported               | 15          | 25   |                              | 25            | 5    |                              |
|                                            | All reported                | 80          | 60   |                              | 70            | 90   |                              |
| <b>Genetic modification <sup>c</sup></b>   | Some reported               | 0           | 11   | 0.4866                       | 6             | 0    | > 0.9999                     |
|                                            | All reported                | 100         | 89   |                              | 94            | 100  |                              |
| <b>Committee approval</b>                  | Not reported                | 10          | 5    | > 0.9999                     | 5             | 5    | > 0.9999                     |
|                                            | Reported                    | 90          | 95   |                              | 95            | 95   |                              |
| <b>Statistics</b>                          |                             |             |      |                              |               |      |                              |
| <b>Definition of statistical tests</b>     | Not reported                | 5           | 0    | 0.2351                       | 0             | 0    | > 0.9999                     |
|                                            | Some reported               | 10          | 30   |                              | 10            | 10   |                              |
|                                            | All reported                | 85          | 70   |                              | 90            | 90   |                              |
| <b>One-sided vs. Two-sided</b>             | Not reported                | 60          | 55   | > 0.9999                     | 35            | 30   | > 0.9999                     |
|                                            | Some reported               | 20          | 20   |                              | 10            | 10   |                              |
|                                            | All reported                | 20          | 25   |                              | 55            | 60   |                              |
| <b>Exact value of sample size</b>          | Not reported                | 5           | 5    | > 0.9999                     | 0             | 0    | > 0.9999                     |
|                                            | Some reported               | 50          | 45   |                              | 45            | 40   |                              |
|                                            | All reported                | 45          | 50   |                              | 55            | 60   |                              |
| <b>Definition of center/dispersion</b>     | Some reported               | 20          | 0    | 0.1060                       | 5             | 20   | 0.3416                       |
|                                            | All reported                | 80          | 100  |                              | 95            | 80   |                              |
| <b>Replicates</b>                          |                             |             |      |                              |               |      |                              |
| <b># of independent experiments</b>        | Not reported                | 30          | 25   | 0.0237                       | 20            | 0    | 0.0796                       |
|                                            | Some reported               | 65          | 35   |                              | 45            | 40   |                              |
|                                            | All reported                | 5           | 40   |                              | 35            | 60   |                              |
| <b>Biological vs. Technical replicates</b> | Not reported                | 15          | 5    | 0.2044                       | 10            | 0    | 0.3341                       |
|                                            | Some reported               | 80          | 70   |                              | 65            | 60   |                              |
|                                            | All reported                | 5           | 25   |                              | 25            | 40   |                              |
| <b>Avoiding Bias</b>                       |                             |             |      |                              |               |      |                              |
| <b>Randomization</b>                       | Not reported                | 95          | 100  | > 0.9999                     | 85            | 15   | <.0001                       |
|                                            | Reported, but not performed | 5           | 0    |                              | 0             | 40   |                              |
|                                            | Reported and performed      | 0           | 0    |                              | 15            | 45   |                              |

|                               |                             |     |     |        |    |    |        |
|-------------------------------|-----------------------------|-----|-----|--------|----|----|--------|
| <b>Blinding</b>               | Not reported                | 95  | 70  | 0.0915 | 65 | 0  | <.0001 |
|                               | Reported, but not performed | 0   | 0   |        | 0  | 55 |        |
|                               | Reported and performed      | 5   | 30  |        | 35 | 45 |        |
| <hr/>                         |                             |     |     |        |    |    |        |
| <b>Precision</b>              |                             |     |     |        |    |    |        |
| <b>Sample-size estimation</b> | Not reported                | 100 | 100 | N/A    | 95 | 25 | <.0001 |
|                               | Reported, but not performed | 0   | 0   |        | 0  | 30 |        |
|                               | Reported and performed      | 0   | 0   |        | 5  | 45 |        |
| <hr/>                         |                             |     |     |        |    |    |        |

n=20 for each group (Total n=80); *P* values by Fisher's exact test; N/A, not applicable

<sup>a</sup> Comparison between *Cell* 2013 and *Cell* 2015; <sup>b</sup> Comparison between *Nature* 2013 and *Nature* 2015; <sup>c</sup> n=16 for *Cell* 2013, n=18 for *Cell* 2015, n=18 for *Nature* 2013, and n=14 for *Nature* 2015
